Genome analysis

# Seave: a comprehensive web platform for storing and interrogating human genomic variation

Velimir Gayevskiy<sup>1</sup>, Tony Roscioli<sup>2,3,4</sup>, Marcel E. Dinger<sup>1,5,6</sup> and Mark J. Cowley<sup>1,5,7,\*</sup>

<sup>1</sup>Kinghorn Centre for Clinical Genomics, Garvan Institute of Medical Research, Darlinghurst, NSW 2010, Australia, <sup>2</sup>Centre for Clinical Genetics, Sydney Children's Hospital, Randwick, NSW 2031, Australia, <sup>3</sup>Prince of Wales Clinical School, University of New South Wales, UNSW Sydney, NSW 2052, Australia, <sup>4</sup>Neuroscience Research Australia, University of New South Wales, UNSW Sydney, NSW 2052, Australia, <sup>5</sup>St Vincent's Clinical School, University of New South Wales, UNSW Sydney, NSW 2052, Australia, <sup>6</sup>Genome.One, Darlinghurst, NSW 2010, Australia and <sup>7</sup>Children's Cancer Institute, UNSW Sydney, NSW 2031, Australia

\*To whom correspondence should be addressed.

Associate Editor: Jonathan Wren

Received on February 28, 2018; revised on May 3, 2018; editorial decision on June 26, 2018; accepted on June 28, 2018

## Abstract

**Motivation:** Genome sequencing has had a remarkable impact on our ability to study the effects of human genetic variation, however, variant interpretation remains the major bottleneck. Understanding the potential impact of variants, including structural variants, requires extensive annotation from disparate sources of knowledge, and *in silico* prediction algorithms.

**Results:** We introduce Seave, an intuitive web platform that enables all types of variants to be securely stored, annotated and filtered. Variants are annotated with allele frequencies and pathogenicity assessments from many popular databases and *in silico* pathogenicity prediction scores. Seave enables filtering of variants with specific inheritance patterns, including somatic variants, by quality, allele frequencies and gene lists which can be curated and saved. Seave was made for whole genome data and is capable of storing and querying copy number and structural variants.

**Availability and implementation:** To demo Seave with public data, see <https://www.seave.bio>. Source code is available at <http://code.seave.bio> and extensive documentation is available at <http://documentation.seave.bio>. Seave can be locally installed on an Apache server with PHP and MySQL, or we provide an Amazon Machine Image for quick deployment. For commercial and clinical diagnostic licensing, contact the corresponding author.

**Contact:** [m.cowley@garvan.org.au](mailto:m.cowley@garvan.org.au)

**Supplementary information:** [Supplementary data](#) are available at *Bioinformatics* online.

## 1 Introduction

The rapid adoption of human genome sequencing has made substantial inroads in our understanding of the impact of genetic variation on health and disease (Delaney *et al.*, 2016). Vast catalogues of genetic variants now exist, tens of thousands of which have been unequivocally linked to disease. Through advances in genomic

technologies and bioinformatic methodologies, it is feasible to comprehensively identify all classes of genomic variation within an individual's genome, ranging from single nucleotide variants (SNVs) and short insertions or deletions (Indels), to large copy number variants (CNVs), structural variants (SVs) and mobile element insertions (MEIs), any of which may contribute to their phenotype.

Interpreting the potential impact of any variant is a difficult task (Amendola *et al.*, 2016), and is a major impediment to widespread adoption of genomic medicine. Variant interpretation requires an assessment of data quality, and investigating dozens of resources, including databases of genomic variation in healthy controls, from patients with disease, resources linking genes to phenotype or disease and the latest literature. All of this information must be kept up to date. Interpreting the impact of novel variants can be supported by potentially dozens of *in silico* pathogenicity scores. CNVs of any size and SVs are important sources of pathogenic variants, and should be considered alongside short variants. Importantly, this genomic complexity must be distilled, and presented in a way which is accessible to all researchers, clinicians and laboratory staff.

To address these challenges, we developed Seave, a web-based variant filtration platform that stores, queries and annotates genomic variation of all sizes. It is designed for clinicians and researchers, primarily for rare disease and cancer, and requires no knowledge of bioinformatics to use.

## 2 Seave description

### 2.1 Scope

Seave was designed from the outset to handle whole-genome-sized variant callsets from tens of thousands of patients, and ably supports data from any sized targeted sequencing panel. Seave supports the following classes of genetic variants: SNVs, Indels, CNVs, SVs and runs of homozygosity (ROH), from the nuclear and mitochondrial genomes. Due to the large file sizes from whole-genome sequencing (i.e.  $\sim 5$ M variants per patient, and  $>3$  Gb compressed VCF files), Seave is designed to automatically receive data generated by production analysis pipelines via an API (Fig. 1).

### 2.2 Data import and annotation

Seave uses GEMINI (Paila *et al.*, 2013) databases to store, manage and query genome data, where each database represents a cohort (Supplementary Fig. S1). GEMINI databases are portable, convenient, sharable and allow Seave to scale to vast numbers of individuals by simply increasing disk space. Users can group samples within a cohort into families, and annotate individuals with their gender and affected status, interactively, or via a PED file.

Importing data starts with annotating VCF files containing SNVs and Indels from one or more individuals using Variant Effect Predictor (VEP; McLaren *et al.*, 2016) or SnpEff (Cingolani *et al.*, 2012), then converting these into a GEMINI database. These databases are then imported into Seave using an API, or the administration interface. Seave manages a MySQL annotation database, which complements the annotations from VEP and GEMINI, to provide pre-computed, extensive *in silico* prediction scores, gene-phenotype-disease links and allele frequencies in healthy controls and various diseases (Fig. 1, Supplementary Data). To keep these annotations up to date, we provide tools for updating those annotations which are regularly updated. Seave supports many popular variant callers including GATK HaplotypeCaller (McKenna *et al.*, 2010), FreeBayes (Garrison and Marth, 2012) and somatic variant callers including Strelka (Saunders *et al.*, 2012), MuTect2 (Cibulskis *et al.*, 2013) and VarDict (Lai *et al.*, 2016). Seave currently supports only the GRCh37 (hg19) reference genome.

To support large CNVs and SVs, we developed the Genome Block Store (GBS). The GBS is a scalable MySQL database designed to store large genomic segments or blocks (e.g. deletions, duplications, inversions, MEIs or ROH), or linked blocks (e.g. gene fusion

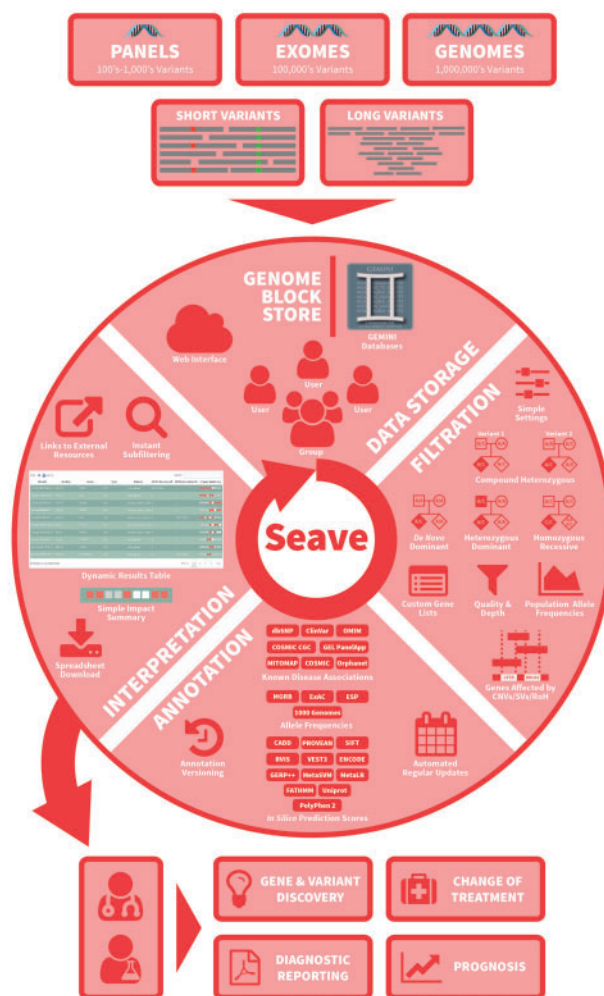

**Fig. 1.** Schematic overview of Seave's main features. Arrows represent the flow of information through sequencing, variant detection, data storage, filtration, annotation, interpretation and outcomes

breakpoints), with additional annotations (e.g. copy number or breakpoint read depth). A number of popular tools are supported, including CNVnator (Abyzov *et al.*, 2011), LUMPY (Layer *et al.*, 2014), Sequenza (Favero *et al.*, 2015), ClinSV (Minoche *et al.*, manuscript in preparation), Manta (Chen *et al.*, 2016), CNVkit (Talevich *et al.*, 2016) and ROHmer (Puttick *et al.*, manuscript in preparation).

### 2.3 Filtering

After selecting a cohort for analysis (Supplementary Fig. S1), users can optionally select to filter short variants by inheritance pattern, including heterozygous dominant, homozygous recessive, *de novo* dominant and compound heterozygous (Supplementary Fig. S2). On the Query page, the genomic search space can be restricted or specifically excluded by using any number of genomic coordinates, curated gene lists from Seave's gene list management system, or custom gene symbols (Supplementary Fig. S3). Variants can be restricted by their impact: low (e.g. synonymous), medium (e.g. missense), high (e.g. nonsense, frameshift and essential splice region), or coding, by CADD score (Kircher *et al.*, 2014) and population allele frequencies. Technical filtering parameters include minimum sequencing depth in all samples, minimum variant quality, excluding failed variants and the type and number of variants to return.

A typical family trio sequenced by whole genome sequencing yields 6 million variants and this number is rapidly reduced to below 200 by just filtering on rarity, impact and inheritance pattern (Supplementary Fig. S4). Most queries take 0–5 s to execute but this can stretch up to 2 min for large cohorts of whole genomes with inheritance patterns specified.

Variants that pass all filters are displayed in a dynamic table, with the extensive annotations noted in Fig. 1 and hyperlinks where applicable (Supplementary Fig. S5). The Impact Summary column visually summarizes the pathogenicity evidence relating to a variant and its cognate gene (Fig. 1, Supplementary Fig. S5). Annotations place variants in the context of the functional genome, and can be dynamically shown using toggle buttons (Supplementary Fig. S6), and sorted by strength of evidence. A unique strength of Seave is that short variants that overlap CNVs or SVs from the same individual in the GBS are highlighted, allowing variants and CNVs to be jointly interrogated. Hyperlinks to control an IGV session are also provided. Results can be shared via their URL, or downloaded to TSV, which includes important auditing information, including timestamps, exact queries used and the versions of all annotations.

There are a number of dedicated queries to interrogate CNVs and SVs, which partially rely on BEDTools (Quinlan and Hall, 2010) to perform interval querying logic. CNVs or SVs can be restricted by gene lists or genomic coordinates, copy number thresholds and minimum CNV size. The SV Fusions search mode is a powerful way to identify candidate gene fusions due to CNV or SV. The Method Overlaps query allows CNVs or SVs identified by multiple callers to be prioritized, whereas the Sample Overlaps query allows CNVs or SVs segregating in families to be prioritized. Finally, the ROHmer query is useful for variant filtering in consanguineous families, and identifies genomic regions of homozygosity that are shared by all affected individuals in a family but not by any unaffected individuals.

## 2.4 Sharing and security

Seave has a user management system, allowing fine grained data sharing control. Databases are owned by a single group, and users can be members of any number of groups. Administrators can import data, manage users, groups, databases, GBS data and custom gene lists. All login events, data import/export, queries, gene list and user or group changes are audited, and all data is transferred and stored using encryption. Seave is written in PHP to be run on an Apache web server with a MySQL database.

## 3 Conclusion

Seave was built to enable gene discovery research, diagnostics and precision cancer medicine from whole genome sequences. As a component of Australia's first clinically accredited whole genome pathology service, Seave has met the rigorous demands of ISO 15189 clinical accreditation. In a research setting, it has been successfully used to discover novel disease genes and variants, as well as rapidly supporting the diagnosis of patients with previously reported pathogenic variants (Balasubramaniam et al., 2017a,b; De Sousa et al., 2017; Ewans et al., 2018; Heimer et al., 2016; Kumar et al., 2016; Riley et al., 2017). Cancer research requires the comprehensive interrogation of large numbers of somatic variants of all sizes and types at differing variant allele frequencies. Accordingly, Seave has been used for characterizing tumour evolution (Merlevede et al., 2016) and as part of two precision cancer genomics programs: the Lions Kids Cancer Genome Project (LKCGP), as part of the Zero

Childhood Cancer Program for children with high-risk cancers using whole genome sequencing and for the Molecular Screening and Therapeutics (MoST) program using a targeted genomics screen to test targeted anti-cancer agents in patients with rare or advanced cancers. Finally, Seave has been used for training purposes in Australia and Hong Kong, across multiple clinical genomics data analysis workshops for clinical geneticists, researchers, laboratory scientists and other health professionals.

## Acknowledgements

We thank members of the Translational Genomics group (KCCG) and Genome. One for their comments and questions that lead to new features and bug fixes. We also thank Dr. Aaron Quinlan for his creation of GEMINI and generous open source licensing.

## Funding

This work was supported by the Kinghorn Foundation, Cancer Institute NSW [grant number 13/ECF/1-46] to MJC and the NSW Department of Health to MJC.

*Conflict of Interest:* MED is the CEO of Genome.One Pty Ltd, which uses Seave as part of its diagnostic workflow. The remaining authors declare that they have no competing interests.

## References

- Abyzov,A. et al. (2011) CNVnator: an approach to discover, genotype, and characterize typical and atypical CNVs from family and population genome sequencing. *Genome Res.*, **21**, 974–984.
- Amendola,L.M. et al. (2016) Performance of ACMG-AMP variant-interpretation guidelines among nine laboratories in the Clinical Sequencing Exploratory Research Consortium. *Am. J. Hum. Genet.*, **98**, 1067–1076.
- Balasubramaniam,S. et al. (2017a) EPG5-related vici syndrome: a primary defect of autophagic regulation with an emerging phenotype overlapping with mitochondrial disorders. In *JIMD Reports*. Springer, Berlin, Heidelberg.
- Balasubramaniam,S. et al. (2017b) Unique presentation of cutis laxa with Leigh-like syndrome due to ECHS1 deficiency. *J. Inherited Metab. Dis.*, **40**, 745–747.
- Chen,X. et al. (2016) Manta: rapid detection of structural variants and indels for germline and cancer sequencing applications. *Bioinformatics*, **32**, 1220–1222.
- Cibulskis,K. et al. (2013) Sensitive detection of somatic point mutations in impure and heterogeneous cancer samples. *Nat. Biotechnol.*, **31**, 213–219.
- Cingolani,P. et al. (2012) A program for annotating and predicting the effects of single nucleotide polymorphisms, SnpEff: sNPs in the genome of *Drosophila melanogaster* strain w(1118); iso-2; iso-3. *Fly*, **6**, 80–92.
- De Sousa,S.M.C. et al. (2017) Germline variants in familial pituitary tumour syndrome genes are common in young patients and families with additional endocrine tumours. *Eur. J. Endocrinol.*, **176**, 635–644.
- Delaney,S.K. et al. (2016) Toward clinical genomics in everyday medicine: perspectives and recommendations. *Exp. Rev. Mol. Diagn.*, **16**, 521–532.
- Ewans,L.J. et al. (2018) Whole-exome sequencing reanalysis at 12 months boosts diagnosis and is cost-effective when applied early in Mendelian disorders. *Genet. Med.*, doi: 10.1038/gim.2018.39.
- Favero,F. et al. (2015) Sequenza: allele-specific copy number and mutation profiles from tumor sequencing data. *Ann. Oncol.*, **26**, 64–70.
- Garrison,E. and Marth,G. (2012) Haplotype-based variant detection from short-read sequencing. *arXiv*: 1207.3907.
- Heimer,G. et al. (2016) MECP mutations cause childhood-onset dystonia and optic atrophy, a mitochondrial fatty acid synthesis disorder. *Am. J. Hum. Genet.*, **99**, 1229–1244.
- Kircher,M. et al. (2014) A general framework for estimating the relative pathogenicity of human genetic variants. *Nat. Publish. Group*, **46**, 310–315.

- Kumar, K.R. *et al.* (2016) Defining the genetic basis of early onset hereditary spastic paraplegia using whole genome sequencing. *Neurogenetics*, **17**, 265–270.
- Lai, Z. *et al.* (2016) VarDict: a novel and versatile variant caller for next-generation sequencing in cancer research. *Nucleic Acids Res.*, **44**, e108.
- Layer, R.M. *et al.* (2014) LUMPY: a probabilistic framework for structural variant discovery. *Genome Biol.*, **15**, R84.
- McKenna, A. *et al.* (2010) The Genome Analysis Toolkit: a MapReduce framework for analyzing next-generation DNA sequencing data. *Genome Res.*, **20**, 1297–1303.
- McLaren, W. *et al.* (2016) The ensembl variant effect predictor. *Genome Biol.*, **17**, 122.
- Merlevede, J. *et al.* (2016) Mutation allele burden remains unchanged in chronic myelomonocytic leukaemia responding to hypomethylating agents. *Nat. Commun.*, **7**, 10767–10713.
- Paila, U. *et al.* (2013) GEMINI: integrative exploration of genetic variation and genome annotations. *PLoS Comput. Biol.*, **9**, e1003153–e1003158.
- Quinlan, A.R. and Hall, I.M. (2010) BEDTools: a flexible suite of utilities for comparing genomic features. *Bioinformatics*, **26**, 841–842.
- Riley, L.G. *et al.* (2017) A SLC39A8 variant causes manganese deficiency, and glycosylation and mitochondrial disorders. *J. Inherited Metab. Dis.*, **40**, 261–269.
- Saunders, C.T. *et al.* (2012) Strelka: accurate somatic small-variant calling from sequenced tumor-normal sample pairs. *Bioinformatics*, **28**, 1811–1817.
- Talevich, E. *et al.* (2016) CNVkit: genome-wide copy number detection and visualization from targeted DNA sequencing. *PLoS Comput. Biol.*, **12**, e1004873.
